# Supplementary material
Source: PubMed Central journal article supplement (PMC7228860)
Supplement: NIHMS1580171-supplement-3.pdf [file NIHMS1580171-supplement-3.pdf]

**A**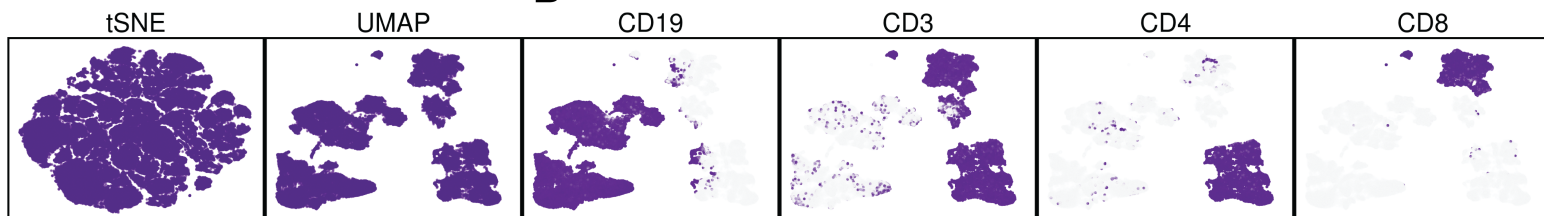**B****C**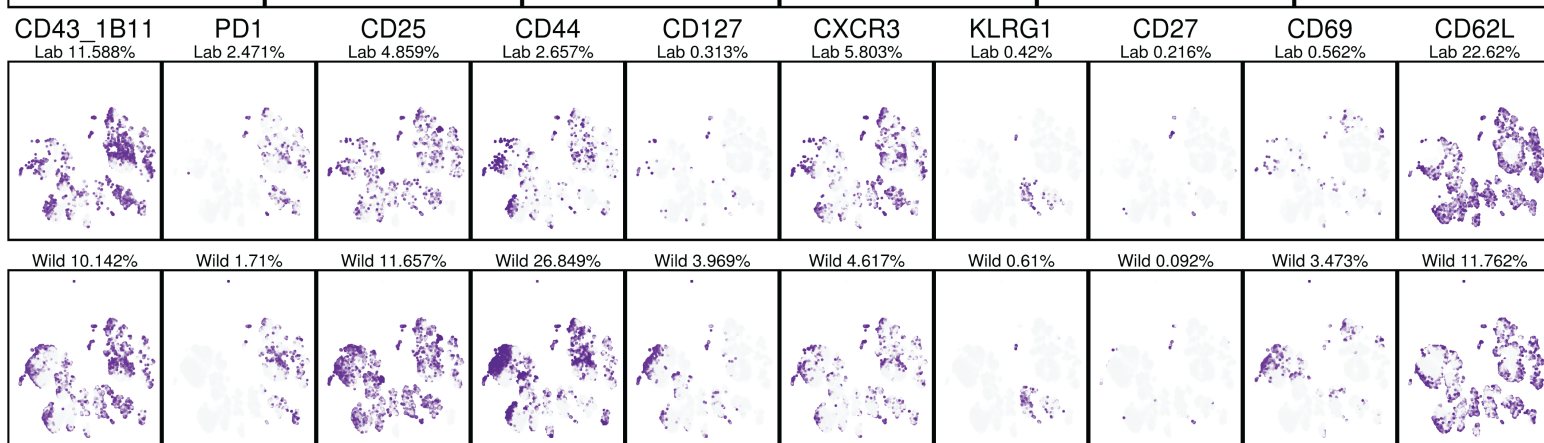**D**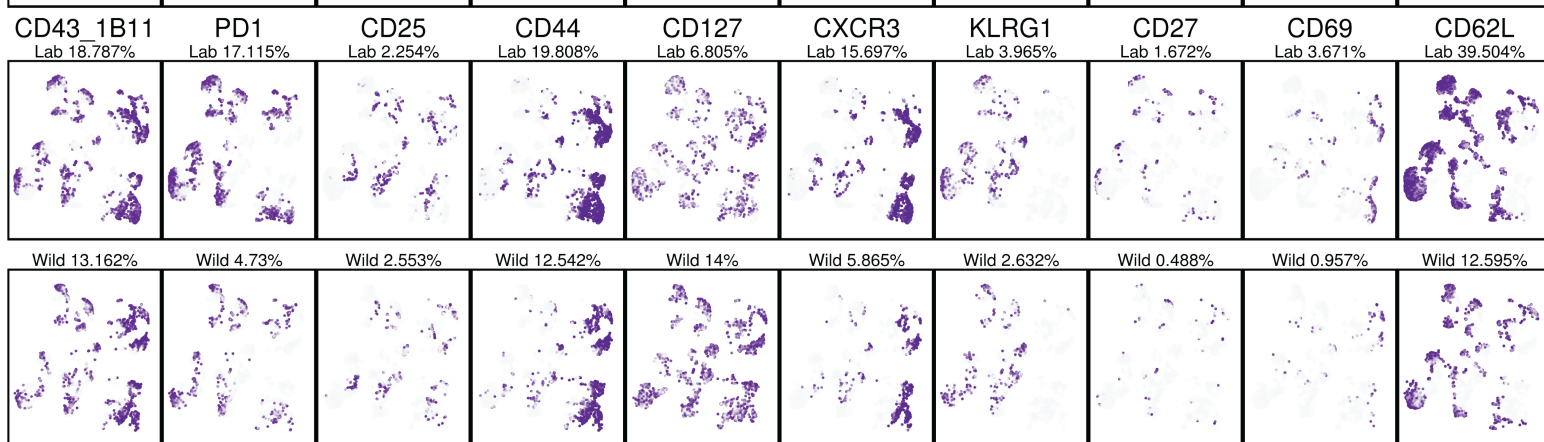**E**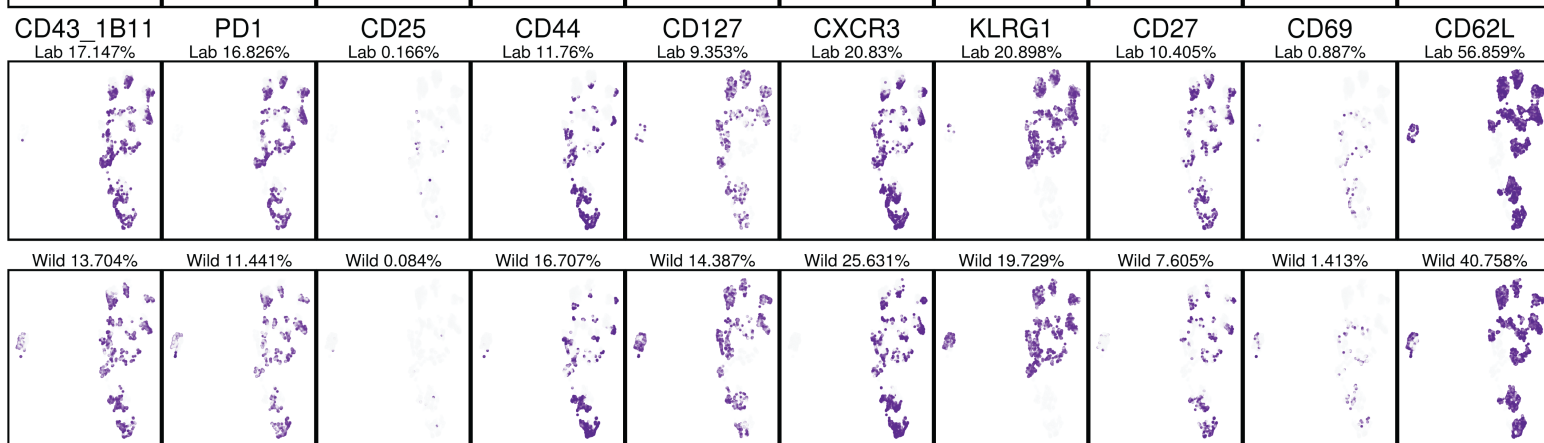

**Figure S1. Identification of immune cell populations that differ between lab and rewilded mice with UMAP. Related to Figure 1.** (A) Projection of ~180,000 CD45+ cells visualized by tSNE vs UMAP. (B) Identification of the major lymphocyte populations on UMAP based on CD19, CD3, CD4 and CD8 expression. (C to E) Expression of cell surface molecules on CD19+ cells (C), CD4+ cells (D) and CD8+ cells (E). In (C), (D) and (E), expression of 1B11, PD1, CD25, CD44, CD127, CXCR3, KLRG1, CD27, CD69, and CD62L are shown as high (purple) or low (grey) from cut-off values based on overall distribution of fluorescence.

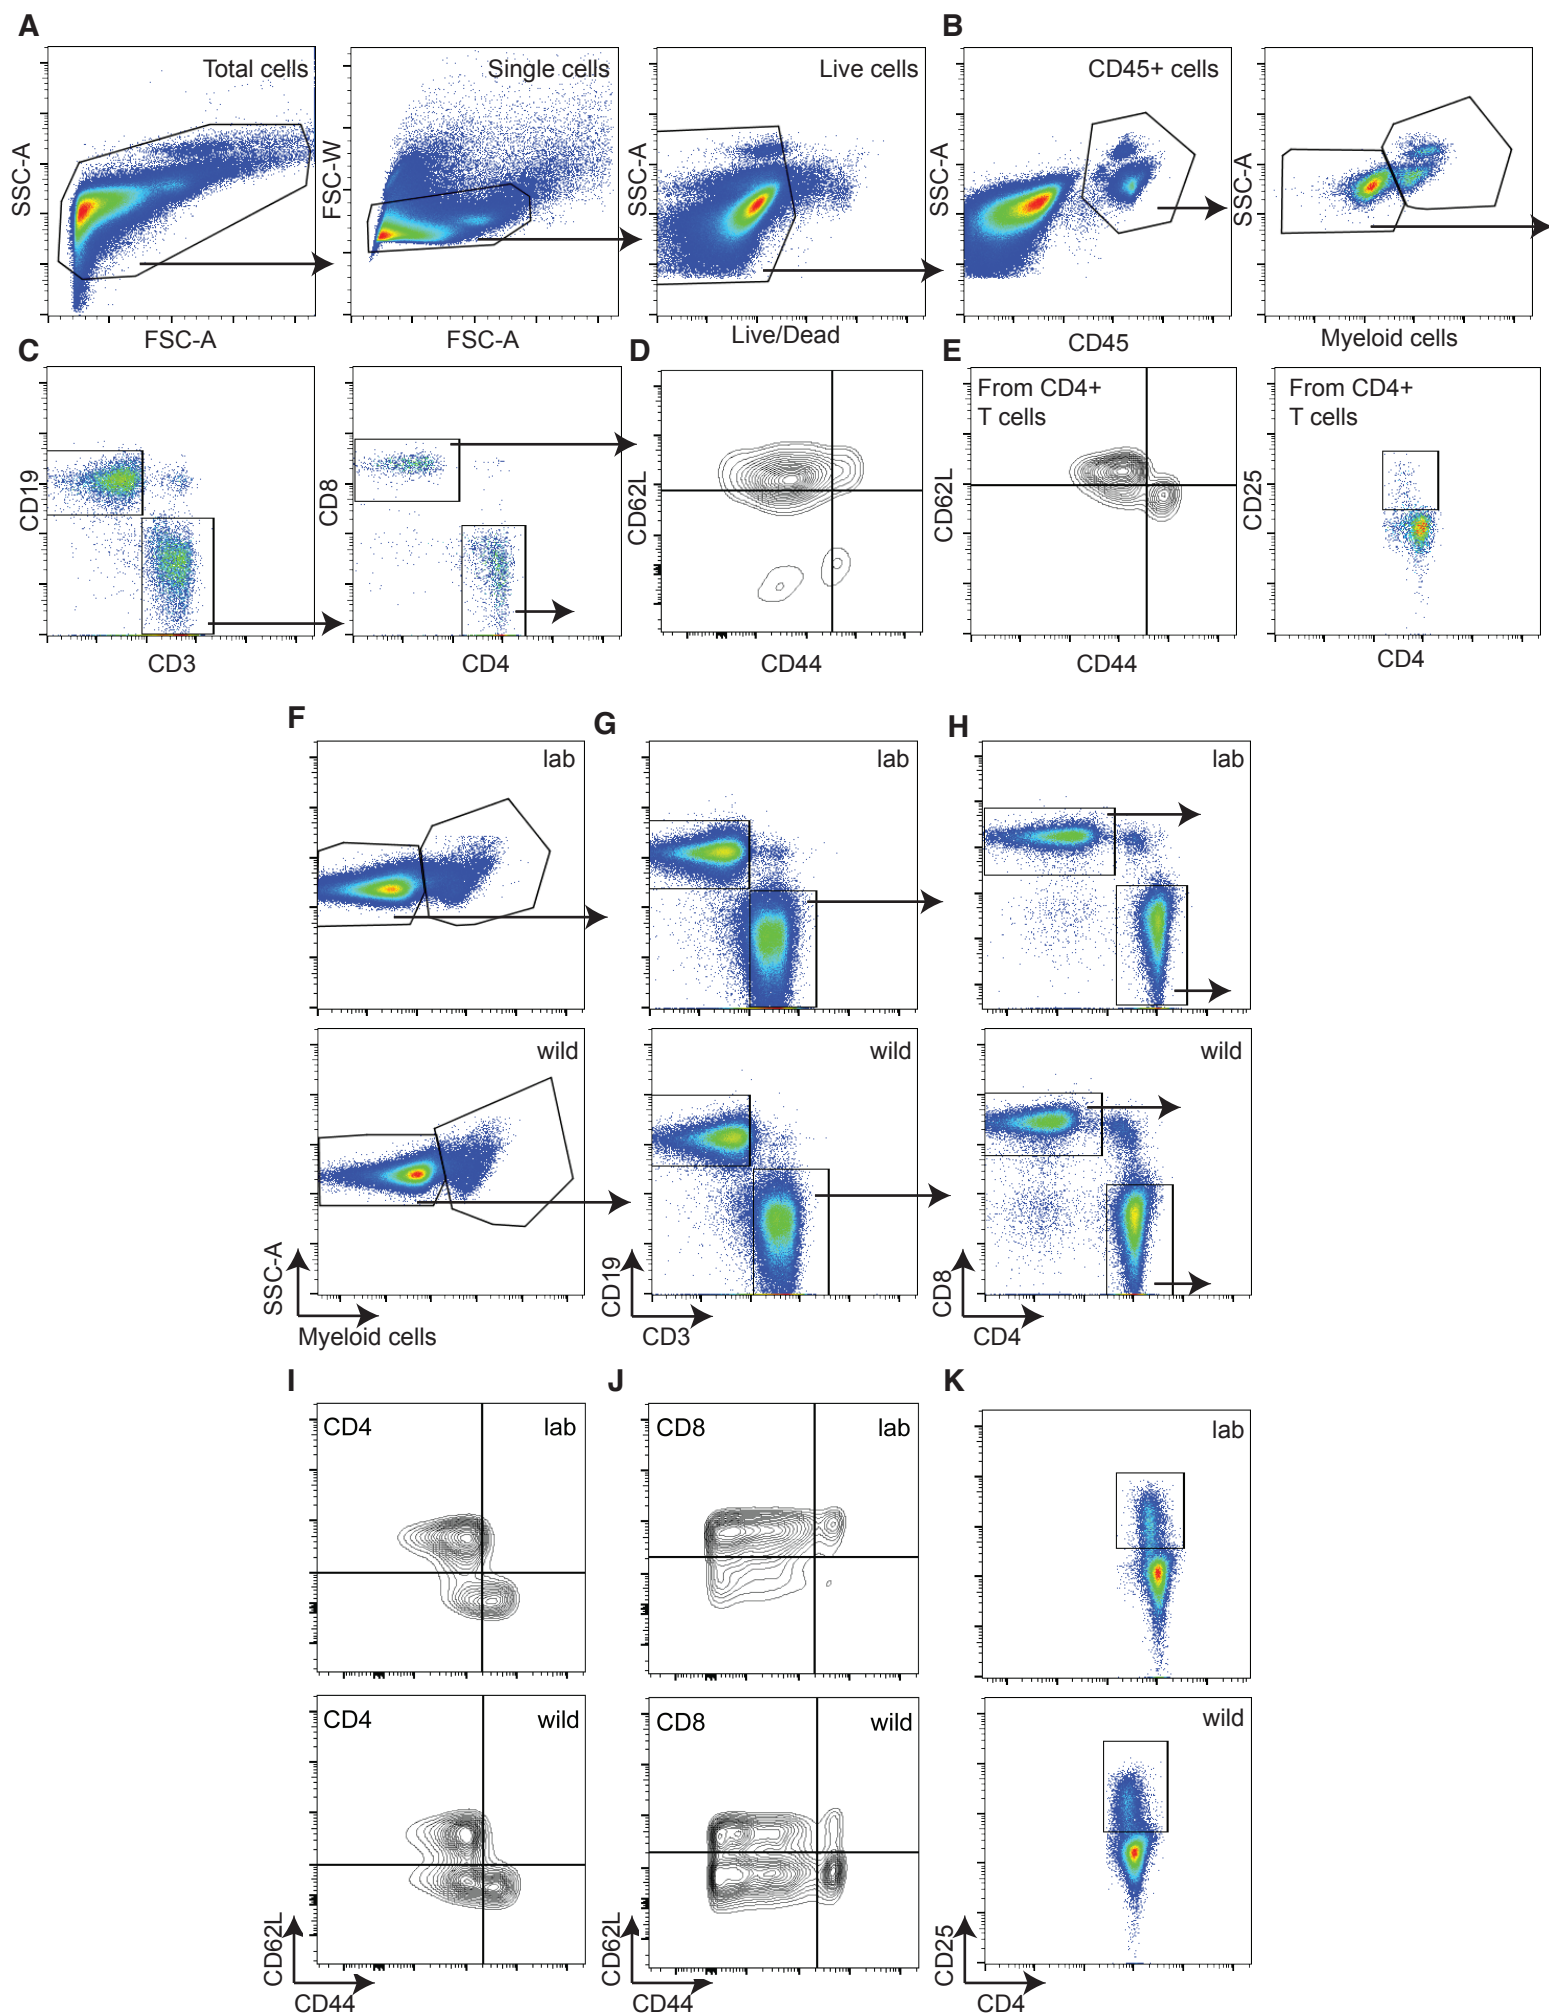

**Figure S2. Flow cytometry gating strategy for the quantification of immune populations in the blood and MLN of lab and rewilded mice. Related to STAR Methods.** (A to E) Representative flow cytometry plots illustrating gating strategy (A) of lymphoid populations in the blood including the total CD45+ cells, total myeloid cells (B), total B and T cells, total CD4 and CD8 T cells (C), CD44<sup>lo</sup>CD62L<sup>hi</sup>, CD44<sup>hi</sup>CD62L<sup>hi</sup>, CD44<sup>hi</sup>CD62L<sup>lo</sup>, CD44<sup>lo</sup>CD62L<sup>lo</sup> CD8 T cells (D), CD44<sup>lo</sup>CD62L<sup>hi</sup>, CD44<sup>hi</sup>CD62L<sup>hi</sup>, CD44<sup>hi</sup>CD62L<sup>lo</sup>, CD44<sup>lo</sup>CD62L<sup>lo</sup> CD4 T cells, and CD25+CD4+ T cells (E). (F to K) Representative flow cytometry plots for immune cell populations after gating for CD45+ cells in the MLNs of lab or rewilded C57BL/6 mice; for the total abundance of myeloid cells (F), B and T cells (G), CD4 and CD8 T cells (H), CD44<sup>lo</sup>CD62L<sup>hi</sup>, CD44<sup>hi</sup>CD62L<sup>hi</sup>, CD44<sup>hi</sup>CD62L<sup>lo</sup>, CD44<sup>lo</sup>CD62L<sup>lo</sup> CD4 T cells (I), CD44<sup>lo</sup>CD62L<sup>hi</sup>, CD44<sup>hi</sup>CD62L<sup>hi</sup>, CD44<sup>hi</sup>CD62L<sup>lo</sup>, CD44<sup>lo</sup>CD62L<sup>lo</sup> CD8 T cells (J), and CD25+CD4+ T cells (K).

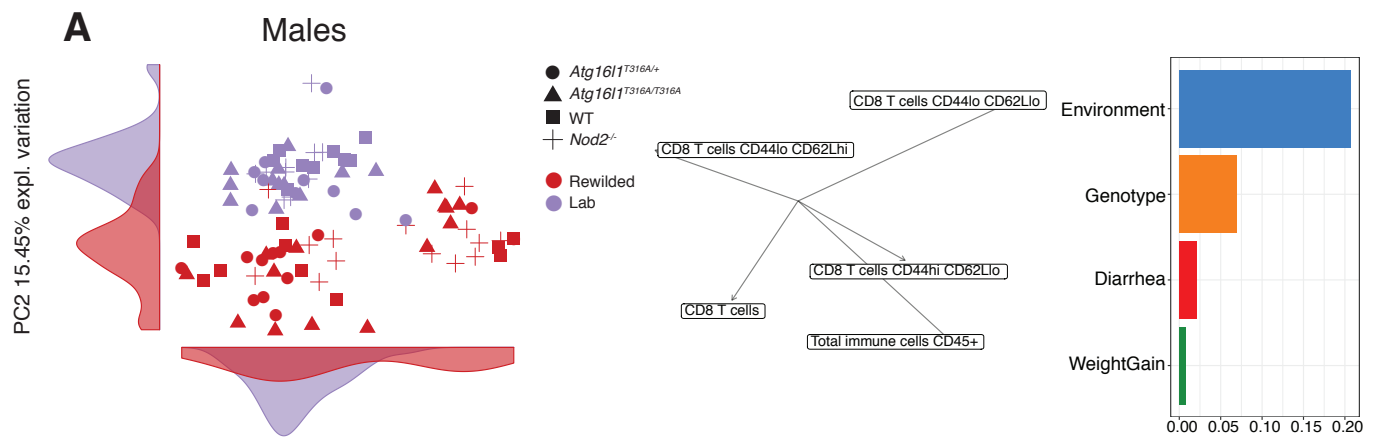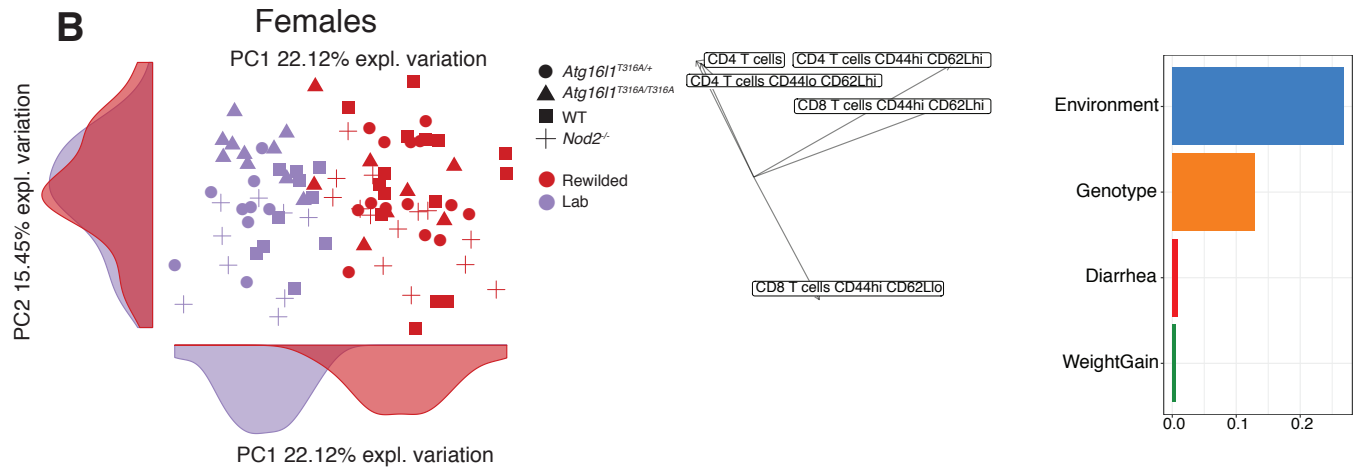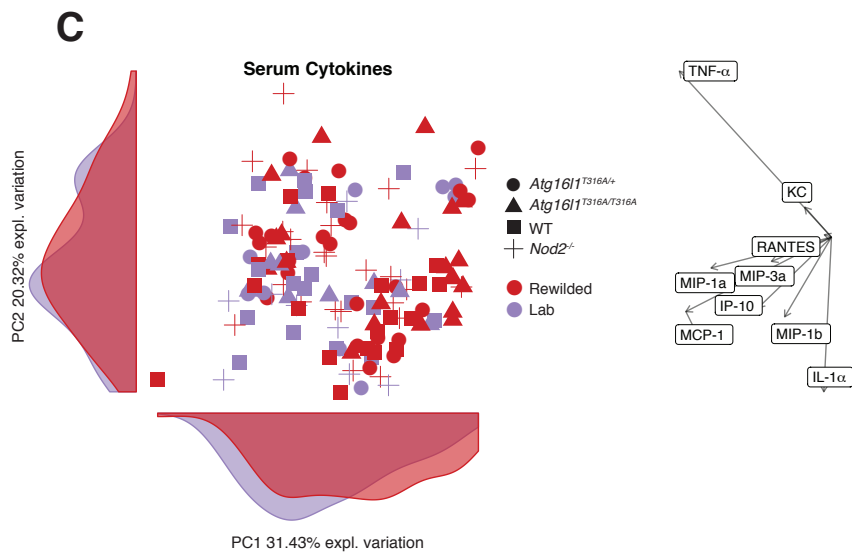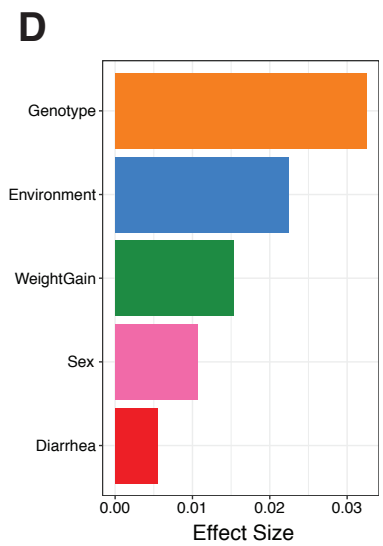

**Figure S3. The effects of environment and genotype on immune cell compositions and plasma cytokine levels for lab and rewilded mice. Related to Figure 1.** (A and B) Principal component analysis (PCA) of gated immune cell populations in the blood and the density of each population along the principal components (PC) for male (A) and female (B) mice separately. Middle panel indicate biplots of the gated immune cell populations that are projected onto PC1 and PC2 that have the biggest effect sizes. Right panels are Bar plots showing the pseudo  $R^2$  measure of effect size on the entire distance matrix used to calculate the PCA of immune cell populations in the blood. (C and D) Levels of RANTES, MIP-3a, KC, TNF- $\alpha$ , MCP-1, IP-10, MIP-1a, MIP-1b, IL-1 $\alpha$ , IL-6 cytokines were measured from the plasma of lab and rewilded mice at the time of sacrifice with bead-based immunoassays (LEGENDplex). (C) PCA of plasma cytokine levels in the blood of individual mice and the density of each population along the principal components (PC). Right panel indicate biplots of the plasma cytokines are projected onto PC1 and PC2. (D) Bar plot showing the pseudo  $R^2$  measure of the effect size of different variables on the variance of plasma cytokine levels.

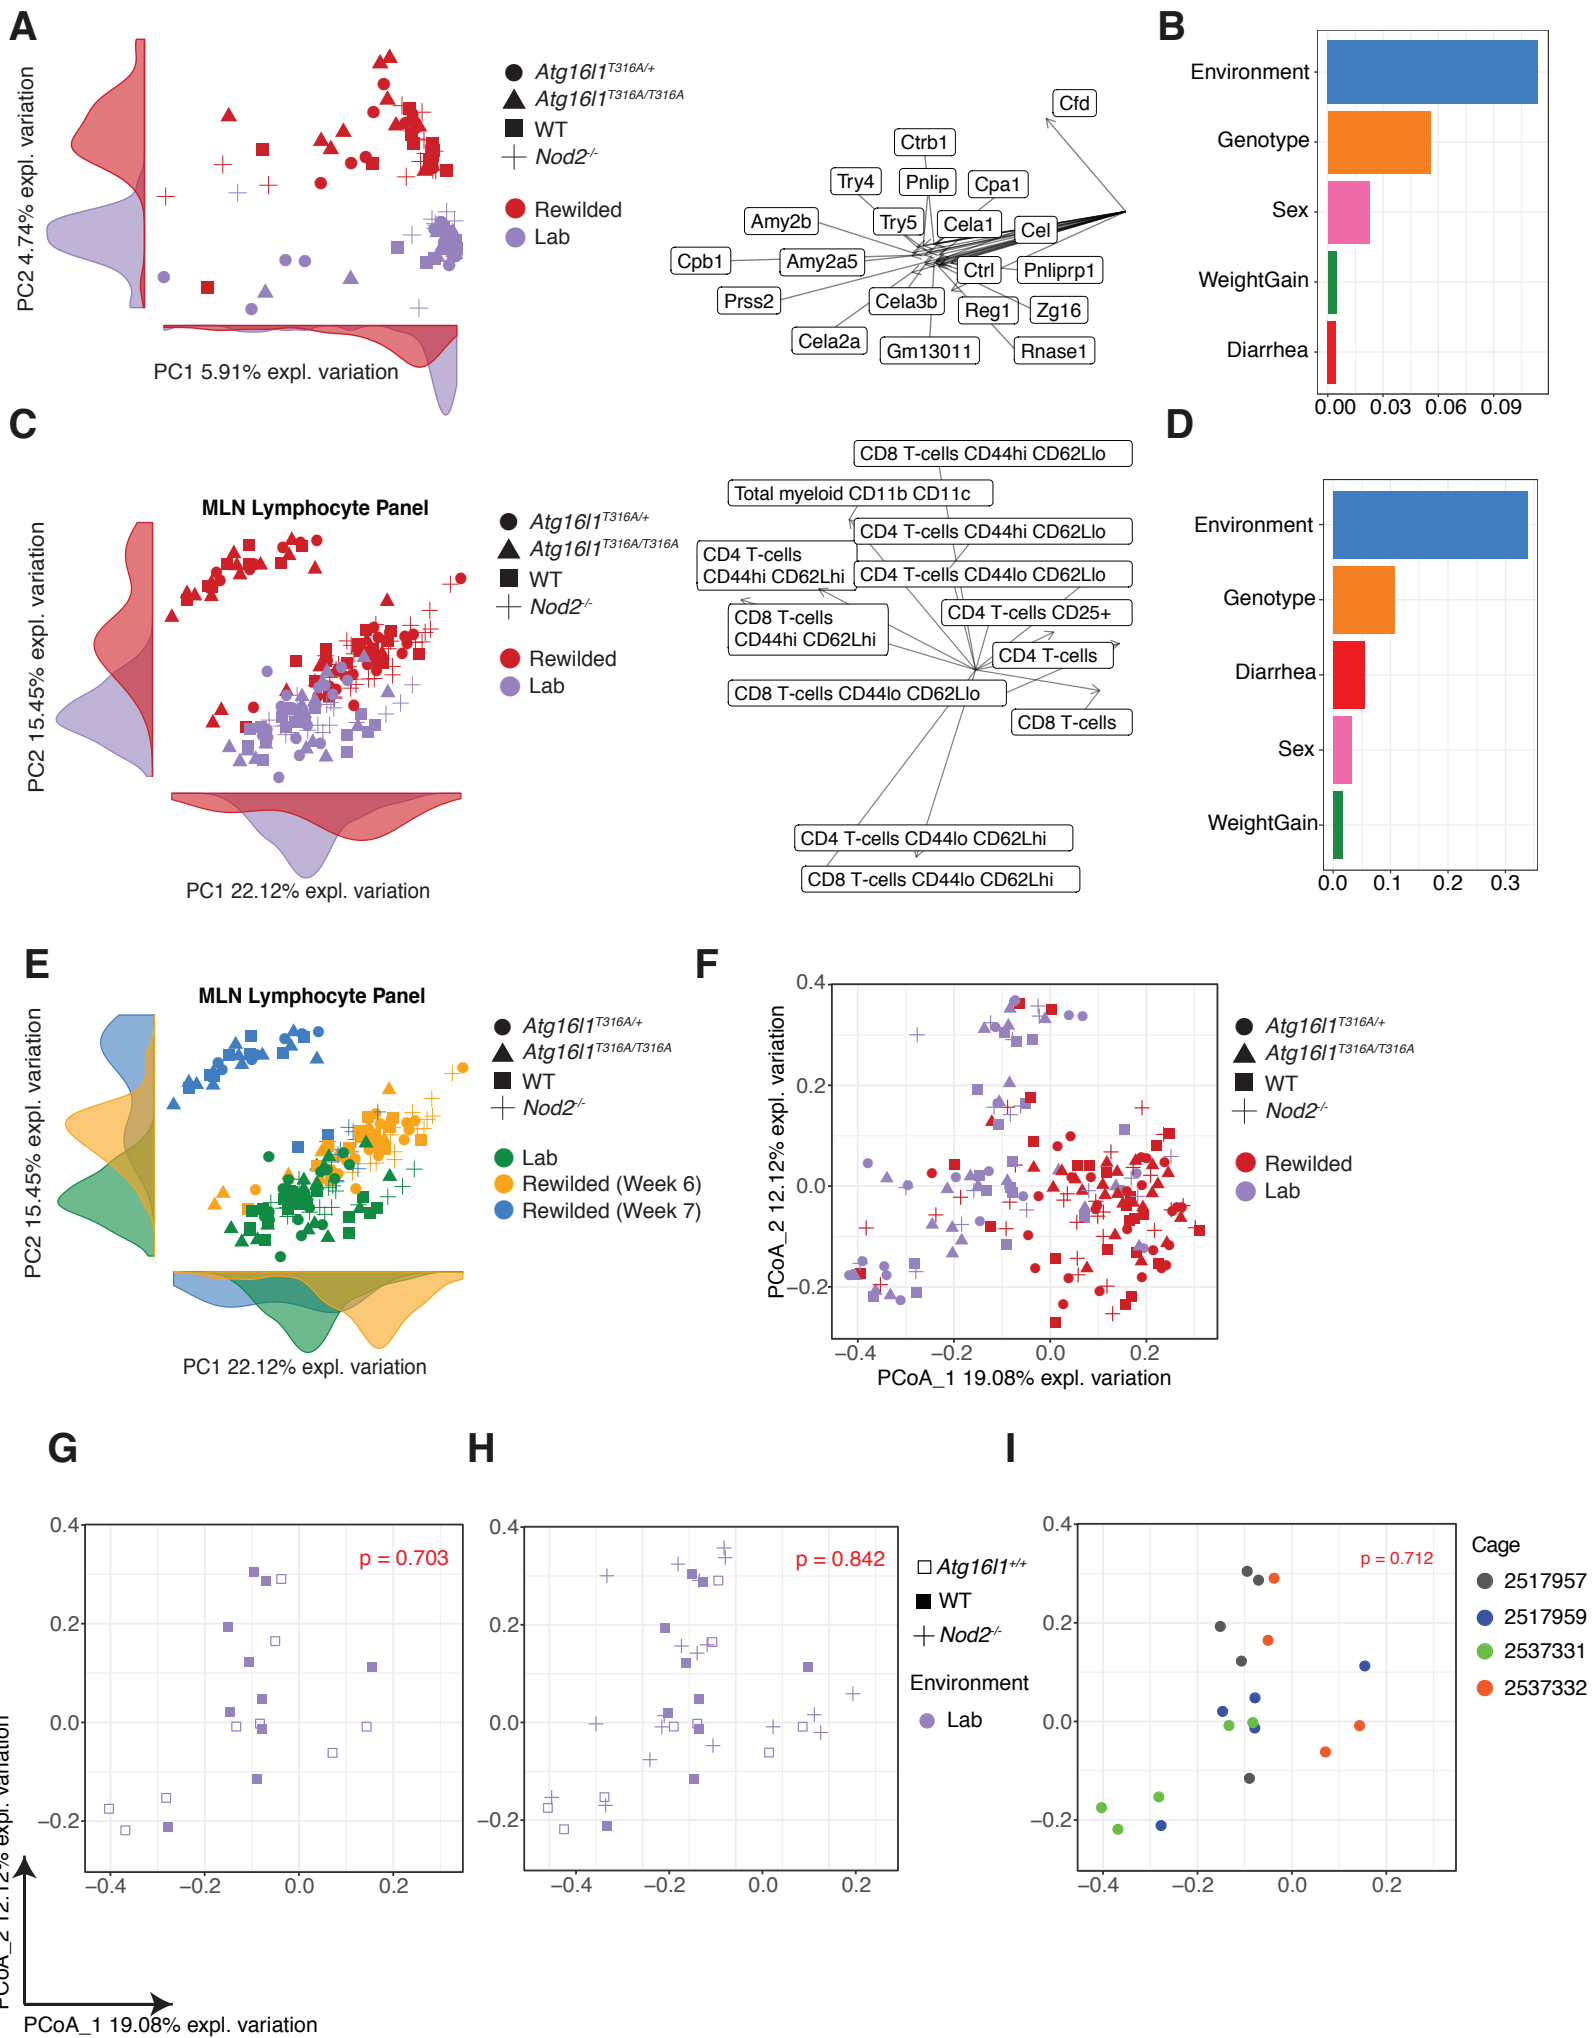

**Figure S4: Environment has the greatest effect on variation of transcriptional profiles, lymphoid populations, and microbial composition. Related to Figure 4.** (A to B) Transcriptional profiles of MLNs were determined by Celseq. (A) PCA based on gene profiles in the MLN and the density of each population along the principal components (PC). Right panel indicates biplots of the genes projected onto PC1 and PC2. (B) Bar plot showing the pseudo  $R^2$  measure of effect size on the entire distance matrix used to calculate the PCA of gene expression levels. (C to E) PCA based on lymphoid populations in the MLN and the density of each population along the principal components (PC). In plot (C), dot color coded by rewilded (red) and lab (purple) and in plot (E), dot color coded by lab (green), rewilded week 6 (yellow), rewilded week 7 (blue). Plot (C) also shows the biplots of the MLN lymphocyte populations are projected onto PC1 and PC2. (D) Bar plot showing the pseudo  $R^2$  measure of effect size on the entire distance matrix used to calculate the PCA of immune populations. (F to I) PCoA based on Bray Curtis distances of 16s rRNA sequencing profiles in all lab and rewilded mice across all genotypes (F), lab wild type (WT) and *Atg16l*<sup>+/+</sup> only (G), lab wild type (WT), *Atg16l*<sup>+/+</sup> and *Nod2*<sup>-/-</sup> (H), and lab wild type (WT), *Atg16l*<sup>+/+</sup> and *Nod2*<sup>-/-</sup> by respective cages (I). P-values were determined by an Adonis test from Bray Curtis distances.



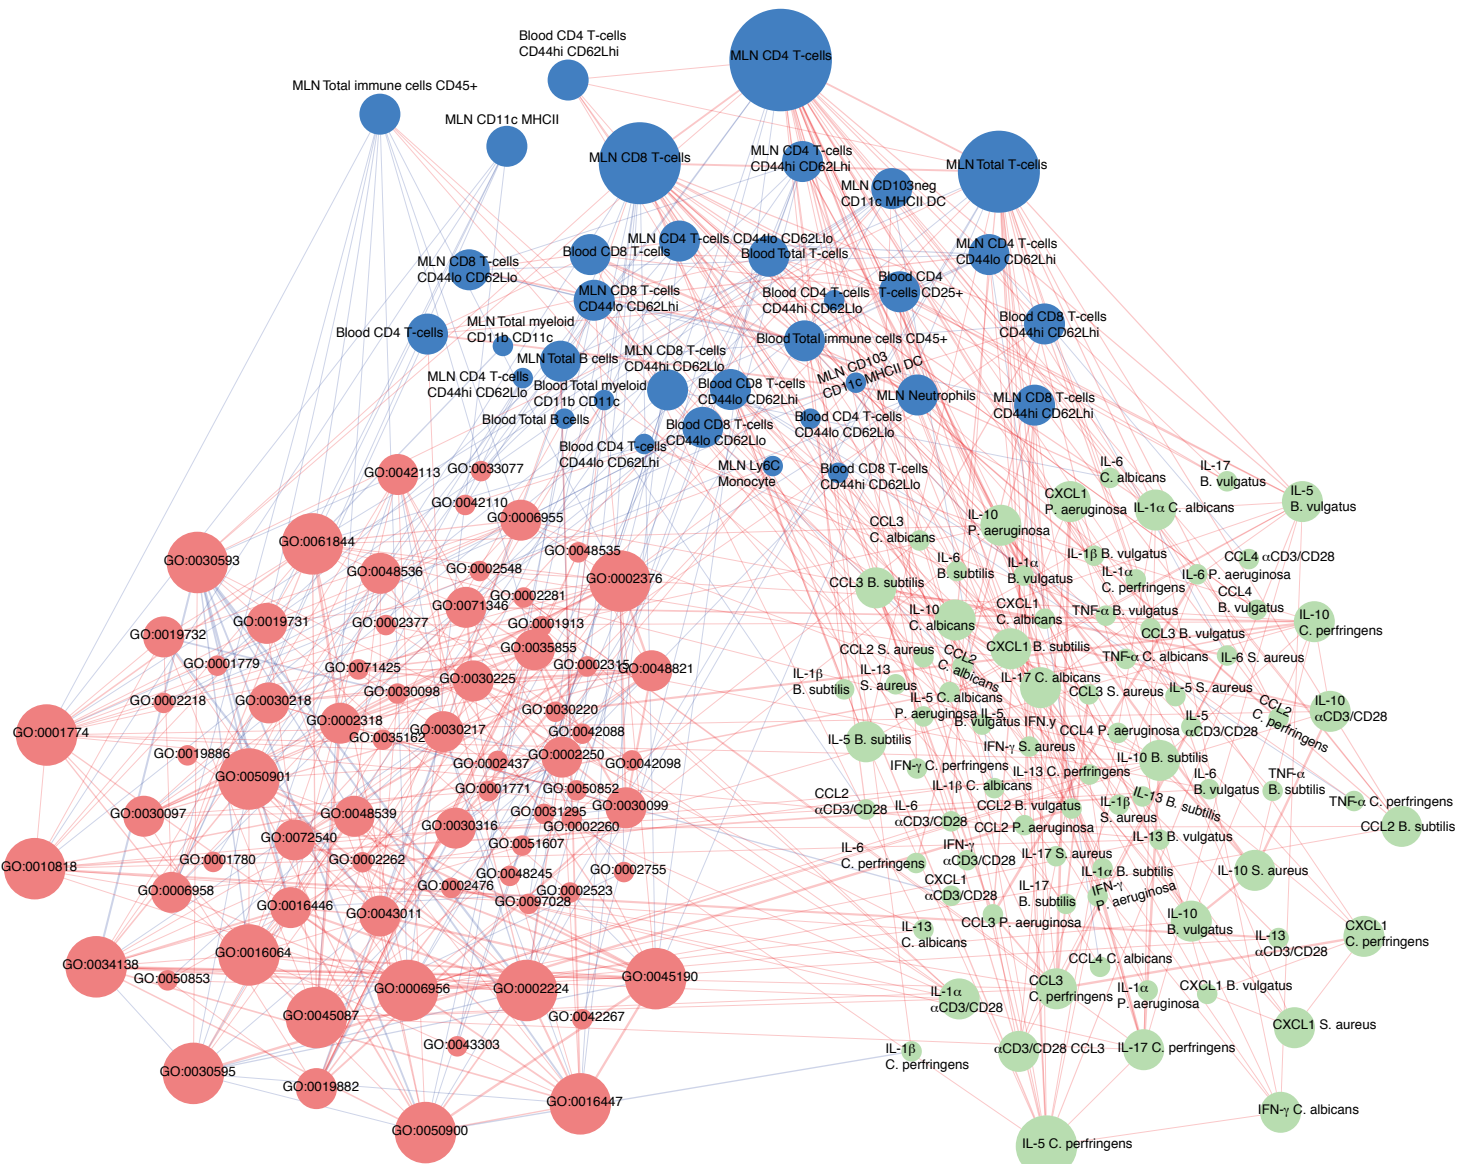

**Figure S5: An unsupervised PLS-regression multi-component network model for multi-omic integration.**  
**Related to Figure 5.** A fully annotated multi-component network as shown in Figure 5A.

**Table S1. Lymphocyte panel of flow cytometry. Related to Figure 1.**

| <b>Immune population</b>                           | <b>Gating strategy</b>                                                                                              |
|----------------------------------------------------|---------------------------------------------------------------------------------------------------------------------|
| Total CD45+ cells                                  | Total cells/Single cells/Live+/CD45+                                                                                |
| Total myeloid cells                                | Total cells/Single cells/Live+/CD45+/CD11b+CD11c+                                                                   |
| Total B cells                                      | Total cells/Single cells/Live+/CD45+/CD11b-CD11c-/<br>CD3-CD19+                                                     |
| Total T cells                                      | Total cells/Single cells/Live+/CD45+/CD11b-CD11c-/<br>CD3+CD19-                                                     |
| Total CD4 T cells                                  | Total cells/Single cells/Live+/CD45+/CD11b-CD11c-/<br>CD3+CD19-/CD4+CD8-                                            |
| Total CD8 T cells                                  | Total cells/Single cells/Live+/CD45+/CD11b-CD11c-/<br>CD3+CD19-/CD4-CD8+                                            |
| CD44 <sup>lo</sup> CD62L <sup>hi</sup> CD4 T cells | Total cells/Single cells/Live+/CD45+/CD11b-CD11c-/<br>CD3+CD19-/CD4+CD8-/<br>CD44 <sup>lo</sup> CD62L <sup>hi</sup> |
| CD44 <sup>hi</sup> CD62L <sup>hi</sup> CD4 T cells | Total cells/Single cells/Live+/CD45+/CD11b-CD11c-/<br>CD3+CD19-/CD4+CD8-/<br>CD44 <sup>hi</sup> CD62L <sup>hi</sup> |
| CD44 <sup>hi</sup> CD62L <sup>lo</sup> CD4 T cells | Total cells/Single cells/Live+/CD45+/CD11b-CD11c-/<br>CD3+CD19-/CD4+CD8-/<br>CD44 <sup>hi</sup> CD62L <sup>lo</sup> |
| CD44 <sup>lo</sup> CD62L <sup>lo</sup> CD4 T cells | Total cells/Single cells/Live+/CD45+/CD11b-CD11c-/<br>CD3+CD19-/CD4+CD8-/<br>CD44 <sup>lo</sup> CD62L <sup>lo</sup> |
| CD44 <sup>lo</sup> CD62L <sup>hi</sup> CD8 T cells | Total cells/Single cells/Live+/CD45+/CD11b-CD11c-/<br>CD3+CD19-/CD4-CD8+/<br>CD44 <sup>lo</sup> CD62L <sup>hi</sup> |
| CD44 <sup>hi</sup> CD62L <sup>hi</sup> CD8 T cells | Total cells/Single cells/Live+/CD45+/CD11b-CD11c-/<br>CD3+CD19-/CD4-CD8+/<br>CD44 <sup>hi</sup> CD62L <sup>hi</sup> |
| CD44 <sup>hi</sup> CD62L <sup>lo</sup> CD8 T cells | Total cells/Single cells/Live+/CD45+/CD11b-CD11c-/<br>CD3+CD19-/CD4-CD8+/<br>CD44 <sup>hi</sup> CD62L <sup>lo</sup> |
| CD44 <sup>lo</sup> CD62L <sup>lo</sup> CD8 T cells | Total cells/Single cells/Live+/CD45+/CD11b-CD11c-/<br>CD3+CD19-/CD4-CD8+/<br>CD44 <sup>lo</sup> CD62L <sup>lo</sup> |
| Total CD25+CD4+ T cells                            | Total cells/Single cells/Live+/CD45+/CD11b-CD11c-/<br>CD3+CD19-/CD4+CD8-/CD25+CD4+                                  |
